# Supplementary material for: Demineralized Dentin Matrix for Dental and Alveolar Bone Tissues Regeneration: An Innovative Scope Review
Source: PubMed Central journal article supplement (PMC9294090; doi:10.1007/s13770-022-00438-4), 2022-04-16
Supplement: 13770_2022_438_MOESM1_ESM.pdf [file 13770_2022_438_MOESM1_ESM.pdf]

**Table 1:** Study characteristics extracted from PubMed database using TDM and regeneration as search terms.

| N | Authors (year, country)           | Study design                          | Source of TDM                                   | Tooth part             | Matrix form                                       | Matrix size                                                                | Deminerlization protocol                                                                                              | Sterilization                                      | Preservation     | Outcome                         |
|---|-----------------------------------|---------------------------------------|-------------------------------------------------|------------------------|---------------------------------------------------|----------------------------------------------------------------------------|-----------------------------------------------------------------------------------------------------------------------|----------------------------------------------------|------------------|---------------------------------|
| 1 | Liu et al. (2021, China) [17]     | <i>In-vitro/ in-vivo</i> animal study | Human teeth                                     | Undefined              | Particles                                         | Undefined                                                                  | 17 mol/L EDTA for 10 min, 10 mol/L for 5 min, and 5 mol/L for 10 min                                                  | Co-60 irradiation                                  | Stored at -80 °C | Odontogenic differentiation     |
| 2 | Li et al. (2021, China) [18]      | <i>In-vitro/ in-vivo</i> animal study | -Human premolars<br>-Porcine deciduous incisors | Root dentin            | Root-shaped matrix                                | 10 mm length and 1.0 mm thickness                                          | -17% EDTA for 5 min, 10% for 5 min, and 5% for 10 min<br>-17% EDTA for 20 min, 10% for 18 min, and 5% for 15 min      | PBS supplemented with antibiotics for 72 h         | α-MEM at 4 °C    | Bio-root regeneration           |
| 3 | Zhang et al (2021, China) [19]    | <i>In-vitro/ in-vivo</i> animal study | -Human premolars<br>-Rat molars                 | Root dentin            | -Particles (liquid extract)<br>-Sheet scaffold    | Undefined                                                                  | Gradient concentrations of EDTA                                                                                       | Ethylene oxide                                     | Freeze-dried     | Bio-root regeneration           |
| 4 | Fu et al. (2021, China) [20]      | <i>In-vitro/ in-vivo</i> animal study | Beagles premolars                               | Root dentin            | Root-shaped matrix to simulate dental pulp cavity | Undefined                                                                  | 17% EDTA for 12 min, 10% for 12 min, and 5% for 20 min                                                                | PBS supplemented with antibiotics for 24 h in 37°C | α-MEM at 4 °C    | Dental pulp regeneration        |
| 5 | Holiel. et al. (2021, Egypt) [21] | <i>In-vivo</i> human study            | Human teeth                                     | Perforated root dentin | Hydrogel                                          | 350-500-μm particle-sized powder dispersed in the sodium alginate solution | 17% EDTA for 10 min, 10% for 10 min, and 5% for 5 min                                                                 | PBS supplemented with antibiotics for 72 h         | Single syringe   | Direct pulp capping             |
| 6 | Zhang et al. (2020, China) [22]   | <i>In-vitro/ in-vivo</i> animal study | Human premolars and molars                      | Root dentin            | Liquid extract of hTDM particles                  | Undefined                                                                  | 17% EDTA for 5 min, 10% for 5 min, and 5% for 10 min                                                                  | PBS supplemented with antibiotics for 72 h         | Undefined        | Dental pulp tissue regeneration |
| 7 | Chang et al. (2020, Taiwan) [23]  | <i>In-vitro/ In-vivo</i> animal study | -Human premolars -Goat incisors                 | Root dentin            | Autoclaved sheet scaffold                         | 2 mm × 6 mm × 6 mm dentin matrices                                         | -17% EDTA for 5 min, and 5% EDTA for 5 min                                                                            | Steam sterilization at 121 °C and 1 bar for 15 min | Undefined        | Tooth regeneration              |
| 8 | Meng et al. (2020, China) [24]    | <i>In-vitro/ In-vivo</i> animal study | Human teeth                                     | Root dentin            | Disc-shaped                                       | Disc with 5 mm thickness                                                   | 10% EDTA for 3 days, and then successively soaked in 17% EDTA for 20 min, 10% EDTA for 20 min, and 5% EDTA for 20 min | PBS supplemented with antibiotics for 72 h         | α-MEM at 4 °C    | Bio-root regeneration           |
| 9 | Bakhtiar et al. (2020,Iran)       | <i>In-vitro/ In-vivo</i> animal study | Bovine posterior teeth                          | Root dentin            | Atelopeptidized particles                         | 250- to 500-μm particles                                                   | 17% EDTA for 1, 7, and 13 days, respectively followed                                                                 | Frozen                                             | Stored at -20 °C | Dentin-pulp tissue engineering  |

|    | [25]                              |                                       |                                                 |             |                    |                                                                                 | by atelopectidization                                   |                                                     |                  |                                                |
|----|-----------------------------------|---------------------------------------|-------------------------------------------------|-------------|--------------------|---------------------------------------------------------------------------------|---------------------------------------------------------|-----------------------------------------------------|------------------|------------------------------------------------|
| 10 | Yang et al. (2019, China) [26]    | <i>In-vitro/ In-vivo</i> animal study | Human premolars                                 | Root dentin | Particles          | Undefined                                                                       | 17% EDTA for 10 min, 10% for 10 min, and 5% for 10 min  | Co <sup>60</sup> radiation sterilization            | Stored at -80 °C | Bio-root regeneration                          |
| 11 | Yang et al. (2019, China) [27]    | <i>In-vitro/ In-vivo</i> animal study | Human premolars                                 | Root dentin | Root-shaped matrix | Undefined                                                                       | 17% EDTA for 12 min, 10% for 12 min, and 5% for 20 min  | PBS supplemented with antibiotics for 24 h in 37 °C | α-MEM at 4 °C    | Bio-root regeneration                          |
| 12 | Sun et al. (2017, China) [28]     | <i>In-vitro/ In-vivo</i> animal study | Porcine deciduous incisors                      | Root dentin | Root-shaped matrix | -10 mm in length and 3-5 mm in diameter<br>-2 mm in length and 1 mm in diameter | 17% EDTA for 20 min, 10% for 18 min, and 5% for 15 min  | PBS supplemented with antibiotics for 72 h          | α-MEM at 4 °C    | Osteoclastogenesis and osteoclastic resorption |
| 13 | Chen et al. (2017, China) [29]    | <i>In-vitro/ In-vivo</i> animal study | -Human premolars<br>-Porcine deciduous incisors | Root dentin | Paste              | 20 g of TDM powder with particles size <76 μm mixed with aqueous TDM extract    | 17% EDTA for 10 min, 10% for 10 min, and 5% for 5 min   | Undefined                                           | Undefined        | Dentin regeneration                            |
| 14 | Li et al. (2017, China) [30]      | <i>In-vitro/ In-vivo</i> animal study | -Porcine deciduous incisors                     | Root dentin | Root-shaped matrix | -10 mm in length and 3-5 mm in diameter                                         | 17% EDTA for 20 min, 10% for 18 min, and 5% for 15 min  | PBS supplemented with antibiotics for 72 h          | α-MEM at 4 °C    | Tooth tissue remodeling                        |
| 15 | Bakhtiar et al. (2017, Iran) [31] | <i>In-vitro/ In-vivo</i> animal study | Dogs premolars                                  | Root dentin | Undefined          | 2-mm-diameter scaffold                                                          | 17 % EDTA for 5 min, 10 % for 5 min, and 5 % for 10 min | PBS supplemented with antibiotics for 72 h          | α-MEM at 4 °C    | Furcation perforation repair                   |
| 16 | Wang et al. (2016, China) [32]    | <i>In-vivo</i> animal study           | Human premolars                                 | Root dentin | Root-shaped matrix | 1.0 cm length and up to 1.0 mm thickness                                        | 17 % EDTA for 5 min, 10 % for 5 min, and 5 % for 10 min | PBS supplemented with antibiotics for 72 h          | α-MEM at 4 °C    | Periodontal tissue regeneration.               |
| 17 | Tian et al. (2015, China) [33]    | <i>In-vitro/ In-vivo</i> animal study | Human premolars                                 | Root dentin | Undefined          | Undefined                                                                       | 17 % EDTA for 5 min, 10 % for 5 min, and 5 % for 10 min | PBS supplemented with antibiotics for 72 h          | DMEM at 4 °C     | Dentin tissue regeneration                     |
| 18 | Luo et al. (2015, China) [34]     | <i>In-vivo</i> animal study           | Mini-swine Incisors                             | Root dentin | Tapered shape      | The upper diameter 4.9 mm, bottom diameter 3.4 mm; and the length 9.4 mm.       | 17% EDTA for 20 min, 10% for 20 min, and 5% for 10 min. | PBS supplemented with antibiotics for 72 h          | α-MEM at 4 °C    | Bio-root regeneration                          |
| 19 | Chen et al. (2015, China) [35]    | <i>In-vitro/ In-vivo</i> animal study | Human premolars                                 | Root dentin | Root-shaped matrix | Undefined                                                                       | 17 % EDTA for 5 min, 10 % for 5 min, and 5 % for 10 min | PBS supplemented with antibiotics for 72 h          | DMEM at 4 °C     | Dentin tissue regeneration                     |
| 20 | Chen et al. (2015, China)         | <i>In-vitro/ In-vivo</i> animal study | Mini-swine Incisors                             | Root dentin | Root-shaped        | Undefined                                                                       | 17% EDTA for 10 min, 10% for 10 min, and 5% for 5       | PBS supplemented with antibiotics for 72            | α-MEM at 4 °C    | Periodontium and dental pulp                   |

|    |                                |                                       |                  |             |                      |                                          |                                                                   |                                            |                                            |                                 |
|----|--------------------------------|---------------------------------------|------------------|-------------|----------------------|------------------------------------------|-------------------------------------------------------------------|--------------------------------------------|--------------------------------------------|---------------------------------|
|    | [36]                           |                                       |                  |             | matrix               |                                          | min.                                                              | h                                          |                                            | regeneration                    |
| 21 | Ji et al. (2015, China) [37]   | <i>In-vitro/ In-vivo</i> animal study | Canine premolars | Root dentin | Root-shaped matrix   | undefined                                | 17% EDTA for 8 min, 10% for 8 min, and 5% for 12 min              | undefined                                  | Undefined                                  | Tooth root regeneration         |
| 22 | Jiao et al. (2015, China) [38] | <i>In-vitro/ In-vivo</i> animal study | Human premolars  | Root dentin | Root-shaped matrix   | length of 1.0 cm and a diameter of 4 mm  | 17 % EDTA for 5 min, 10 % for 5 min, and 5 % for 10 min           | PBS supplemented with antibiotics for 72 h | cryopreserved in liquid nitrogen (-196 °C) | Dentin-pulp tissue regeneration |
| 23 | Yang et al. (2014, China) [39] | <i>In-vitro/ In-vivo</i> animal study | Rat molars       | Root dentin | Undefined            | Undefined                                | 17% EDTA for 3-4 min, and 5% for 2 min                            | PBS supplemented with antibiotics for 72 h | α-MEM at 4 °C                              | Osteogenic differentiation      |
| 24 | Guo et al. (2013, China) [40]  | <i>In-vitro/ In-vivo</i> animal study | Human premolars  | Root dentin | Undefined            | Undefined                                | 17% EDTA, then in 10% and finally in 5% ( time undefined)         | PBS supplemented with antibiotics for 72 h | α-MEM at 4 °C                              | Odontogenic Differentiation     |
| 25 | Yang et al. (2012, China) [41] | <i>In-vitro/ In-vivo</i> animal study | Human premolars  | Root dentin | Root-shaped matrix   | 1.0 cm length and up to 1.0 mm thickness | 17 % EDTA for 5 min, 10 % EDTA for 5 min, and 5 % EDTA for 10 min | PBS supplemented with antibiotics for 72 h | α-MEM at 4 °C                              | Tooth root regeneration         |
| 26 | Guo et al. (2012, China) [42]  | <i>In-vivo</i> animal study           | Rat molars       | Root dentin | Sheet scaffold       | 2 mm × 6 mm × 6 mm dentin matrices       | 17% EDTA for 3-4 min, and 5% for 2 min                            | PBS supplemented with antibiotics for 72 h | α-MEM at 4 °C                              | Tooth roots regeneration        |
| 27 | Li et al. (2011, China) [43]   | <i>In-vitro/ in-vivo</i> animal study | Human premolars  | Root dentin | Root-shaped scaffold | Undefined                                | 17 % EDTA for 5 min, 10 % for 5 min, and 5 % for 10 min           | PBS supplemented with antibiotics for 72 h | DMEM at 4 °C                               | Dentin regeneration             |
| 28 | Guo et al. (2009, China) [44]  | <i>In-vitro/ in-vivo</i> animal study | Rat molars       | Root dentin | Sheet scaffold       | 2 mm × 6 mm × 6 mm dentin matrices       | 17% EDTA for 3-4 min, and 5% for 2 min                            | PBS supplemented with antibiotics for 72 h | α-MEM at 4 °C                              | Dentin regeneration             |

**Table 2:** Study characteristics extracted from PubMed database using DDM and regeneration as search terms

| <b>N</b> | <b>Authors (year, country)</b>            | <b>Study design</b>                   | <b>Source of TDM</b> | <b>Tooth part</b> | <b>Matrix form</b>                                                    | <b>Matrix size</b>                                                                               | <b>Deminerlization protocol</b>                                                                        | <b>Sterilization</b> | <b>Preservation</b>                                 | <b>Outcome</b>                                   |
|----------|-------------------------------------------|---------------------------------------|----------------------|-------------------|-----------------------------------------------------------------------|--------------------------------------------------------------------------------------------------|--------------------------------------------------------------------------------------------------------|----------------------|-----------------------------------------------------|--------------------------------------------------|
| 1        | Kim et al. (2021, Republic of Korea) [45] | <i>In-vivo</i> animal study           | Human teeth          | Root dentin       | Pulverized particles                                                  | 1–2 mm pulverized particles                                                                      | 0.6 N HCl                                                                                              | Ethylene oxide gas   | Room temperature                                    | Bone regeneration                                |
| 2        | Ku et al. (2021, Republic of Korea) [46]  | Case report                           | Human molars         | Root dentin       | Barrier Membrane                                                      | 300 to 800 µm thick slice of autogenous tooth bone graft block with 0.2 to 0.3 mm diameter holes | 0.6 N HCl                                                                                              | Freeze-drying        | Packaged                                            | Guided bone regeneration                         |
| 3        | Han et al. (2021, Republic of Korea) [47] | <i>In-vitro</i> study                 | Human teeth          | Tooth dentin      | Particle-Based Bio-Ink                                                | ≤100 µm                                                                                          | 4 weeks with a 0.5 M EDTA containing protease inhibitors                                               | Gradient ethanol     | Undefined                                           | 3D dental tissue regeneration                    |
| 4        | Kabir et al. (2021, Japan) [48]           | <i>In-vivo</i> animal study           | Human molars         | Tooth dentin      | Perforated root-demineralized dentin matrix                           | The average length and width were 13.08 and 8.41 mm, respectively                                | supersonic demineralization in 5 L of 0.34 N HNO <sub>3</sub> solutions at 100 W and 60 kHz for 30 min | Undefined            | Undefined                                           | Critical-size Iliac defects' regeneration        |
| 5        | Jing et al. (2021, China) [49]            | <i>In-vitro/ in-vivo</i> animal study | Human teeth          | Tooth dentin      | Decorated particles via carboxymethyl chitosan                        | 100-700 µm in diameter                                                                           | 17 mol L <sup>-1</sup> (5 min), 10 mol L <sup>-1</sup> (5 min), 5 mol L <sup>-1</sup> (10 min) EDTA    | Ethylene oxide gas   | stored at 4 °C                                      | Osteogenic differentiation and bone regeneration |
| 6        | Gao et al. (2020, China) [50]             | <i>In-vitro</i> study                 | Human teeth          | Tooth dentin      | Particles                                                             | ≤ 300–1000 µm                                                                                    | 0.71 M HCl for 12 h at 37 °C in a shaker                                                               | Undefined            | 0.1× PBS at 4 °C                                    | Osteogenic differentiation                       |
| 7        | Umebayashi et al. (2020, Japan) [51]      | Case report                           | Human teeth          | Tooth dentin      | Particles of partially DDM and Particulate Cancellous Bone and Marrow | A diameter of approximately 1 mm                                                                 | Partially demineralized in 2% HNO <sub>3</sub>                                                         | Undefined            | Prepared during the operation for bone augmentation | Full regeneration of maxillary alveolar bone     |
| 8        | Um et al. (2019, Republic of Korea) [52]  | Case Series                           | Human teeth          | Root dentin       | Particles loaded with recombinant human bone morphogenetic-2          | 300-800 µm in diameter                                                                           | Demineralized for 30 min in 0.6 N HCl                                                                  | Ethylene oxide gas   | stored at room temperature                          | Socket preservation                              |

|    |                                            |                                       |                                                |              |                                             |                                                 |                                                                                            |                                                                             |                                  |                                                                                                                                                               |
|----|--------------------------------------------|---------------------------------------|------------------------------------------------|--------------|---------------------------------------------|-------------------------------------------------|--------------------------------------------------------------------------------------------|-----------------------------------------------------------------------------|----------------------------------|---------------------------------------------------------------------------------------------------------------------------------------------------------------|
| 9  | Li et al. (2018, China) [53]               | Prospective clinical study            | Human teeth                                    | Tooth dentin | Granules                                    | 300 -1200 µm                                    | Demineralized in 2% HNO <sub>3</sub> for 20 minutes                                        | 5% peracetic acid and 75% ethanol for 10 min                                | Freshly prepared                 | Guided bone for immediate implantation regeneration                                                                                                           |
| 10 | Melling et al. (2018, UK) [54]             | <i>In-vitro</i> study                 | Human teeth                                    | Tooth dentin | DDM extract-loaded liposomes                | Liposomes of ~100 nm ±20 nm                     | 7.5 % EDTA diNa+                                                                           | Lyophilized                                                                 | undefined                        | Dental tissue regeneration                                                                                                                                    |
| 11 | Minamizato et al. (2018, Japan) [55]       | Prospective clinical study            | Vital and non-vital human teeth                | Tooth dentin | Particles                                   | 400 µm to 800 µm                                | 2% HNO <sub>3</sub> (pH 1.0) for 10 min                                                    | Rinsed extensively twice in 0.1 M Tris-HCl (pH 7.4) for 10 min              | Freshly prepared                 | Bone regeneration procedures related to implant dentistry, including socket preservation, alveolar ridge augmentation, and maxillary sinus floor augmentation |
| 12 | Kabir et al. (2017, Japan) [56]            | <i>In-vivo</i> animal study           | Human vital non-functional wisdom teeth        | Tooth dentin | Perforated root-demineralized dentin matrix | Thirty pores of 1mm hole, as the pore size      | Supersonic demineralization in 0.34N HNO <sub>3</sub> solution at 100W and 60kHz for 30min | Undefined                                                                   | Undefined                        | Bone regeneration in critical-size sheep iliac defects                                                                                                        |
| 13 | Pang et al. (2017, Republic of Korea) [57] | prospective randomized clinical trial | Human teeth                                    | Tooth dentin | Particles                                   | 300 and 800 µm                                  | 0.6 N HCl                                                                                  | Ethylene oxide gas                                                          | Room temperature                 | Alveolar bone defect                                                                                                                                          |
| 14 | Nam et al. (2016, Republic of Korea) [58]  | <i>In-vivo</i> animal study           | Human teeth                                    | Tooth dentin | Particles                                   | 0.25 to 1.0 mm in size or 1.0 to 2.0 mm in size | Demineralized for 15 h in hydrochloric acid                                                | Ethylene oxide gas                                                          | Packaged                         | Cranial bone regeneration                                                                                                                                     |
| 15 | Kim et al. (2016, Republic of Korea) [59]  | <i>In-vivo</i> animal study           | Human teeth                                    | Tooth dentin | Particles                                   | 1~2-mm-sized crushed particles                  | Undefined                                                                                  | Ethylene oxide gas                                                          | Packaged                         | Bone-forming capacity                                                                                                                                         |
| 16 | Kim et al. (2016, Republic of Korea) [60]  | Case report                           | Human teeth                                    | Tooth dentin | Particles                                   | 0.5 to 1.0 mm                                   | Undefined                                                                                  | Ethylene oxide gas                                                          | Packaged                         | Guided Bone Regeneration                                                                                                                                      |
| 17 | Gomes et al. (2016, Brazil) [61]           | <i>In-vivo</i> animal study           | Central incisors of the normoglycaemic rabbits | Tooth dentin | Slices                                      | 8 µm in thickness                               | 0.6 N-HCl solution at 2°C until complete demineralization                                  | Slices were immersed in a box filled with 5 mL alcohol/0.2 mL of gentamicin | Stored at 2°C until implantation | Bone tissue engineering in cranioplasty of diabetic rabbits                                                                                                   |
| 18 | Koga et al. (2016, Japan) [62]             | <i>In-vitro/ in-vivo</i> animal study | Vital or non-vital human teeth                 | Tooth dentin | Particles                                   | 180 µm/ 1200 µm                                 | 2% HNO <sub>3</sub> , partially/ completely demineralized dentin matrix                    | Rinsed twice in 0.1 M Tris-HCl (pH 7.4), for 10 minutes.                    | Undefined                        | Bone Regeneration                                                                                                                                             |
| 19 | Liu et al. (2016, China) [63]              | <i>In-vitro/ in-vivo</i> animal study | Human teeth                                    | Tooth dentin | Extract                                     | 1 mg/ 10 mg/ml                                  | Undefined                                                                                  | Undefined                                                                   | Freshly prepared                 | Odontoblastic Differentiation of Dental Pulp Stem                                                                                                             |

## Cells

|    |                                     |                                       |                                                |              |                    |                                              |                                                           |                                                                             |                                  |                                                  |
|----|-------------------------------------|---------------------------------------|------------------------------------------------|--------------|--------------------|----------------------------------------------|-----------------------------------------------------------|-----------------------------------------------------------------------------|----------------------------------|--------------------------------------------------|
| 20 | Qin et al. (2015, China) [64]       | <i>In-vitro/ in-vivo</i> animal study | Human teeth                                    | Crown dentin | Semi-rigid barrier | Slices of cubic appearance with 2 × 2 × 8 mm | 0.6 M HCl solution                                        | Undefined                                                                   | Undefined                        | Guiding periodontal tissue regeneration          |
| 21 | Bakhshalian et al. (2013, USA) [65] | <i>In-vivo</i> animal study           | Rabbit mandibular incisor                      | Tooth dentin | Particles          | 300 µm                                       | 0.6 M HCl for 1 week/ tooth                               | The teeth were mixed in a sterile container                                 | Room temperature                 | Osteopromotive Property                          |
| 22 | Li et al. (2013, China) [66]        | <i>In-vitro/ in-vivo</i> animal study | Human teeth                                    | Tooth dentin | Granules           | 10–140 meshes                                | Undefined                                                 | irradiated with Cobalt 60 at a radiation dose of 5 kGy                      | Undefined                        | Bone tissue regeneration                         |
| 23 | Zhang et al. (2012, China) [67]     | <i>In-vitro/ in-vivo</i> animal study | Incisors of twenty 8-week-old SD rats          | Tooth dentin | Granules           | 200– 280 µm                                  | 17% EDTA, pH 8.0 at 4C for 10 min                         | Ethylene oxide gas                                                          | Undefined                        | Dentinogenic Potential of Dental Pulp Stem Cells |
| 24 | Yagihashi et al. (2009, Japan) [68] | <i>In-vivo</i> animal study           | ovine lower anterior teeth                     | Tooth dentin | Particles          | 250- to 500-µm                               | 0.6 N HCl for 1 week/ tooth                               | Ethylene oxide gas                                                          | Undefined                        | Repair of articular cartilage defects            |
| 25 | Gomes et al. (2008, Brazil) [69]    | <i>In-vivo</i> animal study           | Central incisors of the normoglycaemic rabbits | Tooth dentin | Slices             | 8 µm in thickness                            | 0.6 N-HCl solution at 2°C until complete demineralization | Slices were immersed in a box filled with 5 mL alcohol/0.2 mL of gentamicin | Stored at 2°C until implantation | Bone repair                                      |
| 26 | Gomes et al. (2002, Brazil) [70]    | <i>In-vivo</i> animal study           | Central incisors of the normoglycaemic rabbits | Tooth dentin | Slices             | 8 µm in thickness                            | 0.6 N-HCl solution at 2°C until complete demineralization | Slices were immersed in a box filled with 5 mL alcohol/0.2 mL of gentamicin | Stored at 2°C until implantation | Bone repair                                      |
| 27 | Gomes et al. (2001, Brazil) [71]    | <i>In-vivo</i> animal study           | Central incisors of the normoglycaemic rabbits | Tooth dentin | Slices             | 8 µm in thickness                            | 0.6 N-HCl solution at 2°C until complete demineralization | Slices were immersed in a box filled with 5 mL alcohol/0.2 mL of gentamicin | Stored at 2°C until implantation | Bone repair                                      |

**Table 3:** Study characteristics extracted from Medline (OVID) database using TDM and regeneration as search terms.

| N | Authors (year, country)              | Study design                           | Source of TDM                                    | Tooth part   | Matrix form                       | Matrix size                                                                           | Deminerlization protocol                                      | Sterilization                               | Preservation                    | Outcome                     |
|---|--------------------------------------|----------------------------------------|--------------------------------------------------|--------------|-----------------------------------|---------------------------------------------------------------------------------------|---------------------------------------------------------------|---------------------------------------------|---------------------------------|-----------------------------|
| 1 | Xu et al. (2021, China [72])         | <i>In-vitro/ in-vivo</i> animal study  | Mandibular and maxillary premolars               | Root dentin  | Root segment                      | 10 mm-long segments, and the root canal was enlarged to 5 mm in diameter of both ends | 17%, 10%, and 5% EDTA, respectively, for 30 minutes           | Soaked into penicillin-streptomycin         | 4°C over 3 days                 | Dental Pulp Regeneration    |
| 2 | Elfana et al. (2021, Egypt) [73]     | A randomized controlled clinical trial | Non-molar human teeth                            | Tooth dentin | Particles                         | Undefined                                                                             | 0.6 N HCl for 30 min                                          | Undefined                                   | Undefined                       | Alveolar ridge preservation |
| 3 | Wen et al. (2021, China) [74]        | <i>In-vitro/ in-vivo</i> animal study  | -Healthy human third molars<br>-Porcine incisors | Tooth dentin | Particles to get aqueous extracts | ≤ 40 μm                                                                               | 17%, 10%, and 5% EDTA, respectively, for 30 minutes           | Sterilized by radiation of Co <sub>60</sub> | α-MEM culture medium for 7 days | Reparative dentin formation |
| 4 | Mehrvarzfar et al. (2018, Iran) [75] | Clinical trial                         | Intact human third molars                        | Crown dentin | Dentin chips                      | 1 mm thickness                                                                        | 17% EDTA for 5 min, 10% EDTA for 5 min and 5% EDTA for 10 min | Rinsed with sterile saline for 10 min       | stored in PBS until required    | Partial pulpotomy           |

**Table 4:** Study characteristics extracted from Medline (OVID) database using DDM and regeneration as search terms.

| N | Authors (year, country)                    | Study design                                       | Source of TDM                   | Tooth part   | Matrix form              | Matrix size                         | Deminerlization protocol                                                                                                                           | Sterilization                                   | Preservation                                                                        | Outcome                                                |
|---|--------------------------------------------|----------------------------------------------------|---------------------------------|--------------|--------------------------|-------------------------------------|----------------------------------------------------------------------------------------------------------------------------------------------------|-------------------------------------------------|-------------------------------------------------------------------------------------|--------------------------------------------------------|
| 1 | Ouyyamwongs et al. (2019, Thailand) [76]   | A Split-Mouth Randomized Controlled Clinical Trial | Intact human third molars       | Tooth dentin | Particles                | 500-700 µm                          | Undefined                                                                                                                                          | Sterilized with ethylene oxide gas              | Undefined                                                                           | Alveolar Ridge Preservation                            |
| 2 | Xu et al. (2018, Republic of Korea) [77]   | <i>In-vivo</i> animal study                        | Human permanent teeth           | Tooth dentin | Particles                | 0.8 to 1.0 mm                       | 0.6N HCl for 15 min                                                                                                                                | Sterilized with sterilization reagent           | Undefined                                                                           | Maxillary sinus augmentation                           |
| 3 | Feng et al. (2018, China) [78]             | <i>In-vitro/ in-vivo</i> animal study              | Intact human third molars       | Root dentin  | Porous sheet             | 100 µm thickness                    | 0.6 M HCl for 2 weeks                                                                                                                              | Dipped in PBS and placed at 4°C overnight       | Put in a sterile EP tube at -20°C until use                                         | Periodontal ligament-like tissue regeneration          |
| 4 | Al-Asfour et al. (2017, Sweden) [79]       | <i>In-vivo</i> animal study                        | Human premolars                 | Root dentin  | Cylindrical dentin block | 5 mm in diameter and 2 mm thickness | 24%EDTA neutral, pH7, for 12 h                                                                                                                     | Undefined                                       | Undefined                                                                           | Onlay grafts to rabbit tibia                           |
| 5 | Park et al. (2015, Republic of Korea) [80] | <i>In-vivo</i> animal study                        | Exfoliated deciduous teeth      | Crown dentin | Particles                | 800 -1000 µm in size                | 0.6N HCl was done for 0, 10, 15, 20, 25, 30, 60 and 90 min respectively for <i>in vitro</i> analysis, and for 15 min for <i>in vivo</i> experiment | Sterilized with peracetic acid-ethanol solution | Prepared sample was kept in the refrigerator at 4°C                                 | Bone healing                                           |
| 6 | Park et al. (2015, Republic of Korea) [81] | <i>In-vitro/ in-vivo</i> animal study              | Extracted human permanent teeth | Tooth dentin | Dentin blocks            | 5 mm in diameter, 2 mm in height    | 0.6N HCl for 10 and 60 min each                                                                                                                    | Sterilized with peracetic acid-ethanol solution | Prepared sample was kept in the refrigerator at 4°C                                 | Bone formation                                         |
| 7 | de Oliveira et al. (2013, Brazil) [82]     | <i>In-vivo</i> animal study                        | Human permanent teeth           | Root dentin  | Slice                    | Undefined                           | 10%EDTA, pH 7.2 at room temperature for approximately 3 months                                                                                     | Washed sterilized deionized water for 10 min    | Stored in sterile PBS containing 100 units/ml penicillin and 100 mg/ml streptomycin | Bone formation during healing process of tooth sockets |
| 8 | Mordenfeld et al. (2011, Sweden) [83]      | <i>In-vivo</i> animal study                        | Unerrupted developing pig teeth | Tooth dentin | Dentin block             | 2–3mm thick and 4 mm in diameter    | 24% EDTA (pH 7.0) for 1, 2, 6 or 12 h, respectively, in room temperature                                                                           | Undefined                                       | Stored for one to 2months in a freezer at -18°C before implantation                 | Tissue reactions to subperiosteal onlays               |
| 9 | Koike et al. (2005, Japan) [84]            | <i>In-vivo</i> animal study                        | Rat incisors                    | Root dentin  | Dentin tubes             | 8 mm in length                      | 0.6 N HCl at room temperature for 3 h                                                                                                              | Undefined                                       | Undefined                                                                           | Ectopic bone formation                                 |
